# Supplementary material for: Highly luminescent perovskite–aluminum oxide composites
Source: Royal Society of Chemistry journal article supplement (doi:10.1039/c5tc02447a), 2015-01-01
Supplement: c5tc02447a1.pdf [file c5tc02447a1.pdf]

Electronic Supplementary Information

**Highly luminescent perovskite-aluminum oxide composites**

Giulia Longo, Antonio Pertegás, Laura Martínez-Sarti, Michele Sessolo\* and Henk J. Bolink

Instituto de Ciencia Molecular (ICMOL), Universidad de Valencia, 46980 Paterna, Valencia, Spain

\*To whom all correspondence should be addressed: Email: [michele.sessolo@uv.es](mailto:michele.sessolo@uv.es)

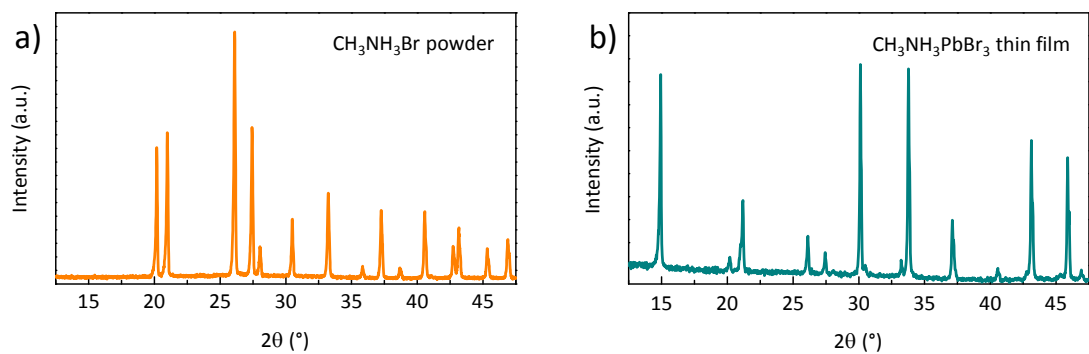

**Figure S1.** GIXRD spectra of a)  $\text{CH}_3\text{NH}_3\text{Br}$  powder and b) a pure  $\text{CH}_3\text{NH}_3\text{PbBr}_3$  thin film.

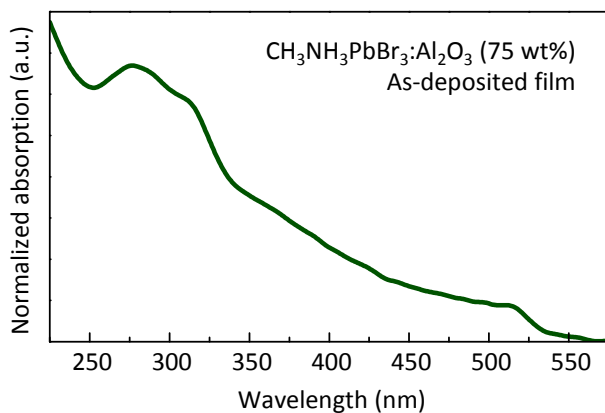

**Figure S2.** UV-Vis absorption of a pristine  $\text{CH}_3\text{NH}_3\text{PbBr}_3:\text{Al}_2\text{O}_3$  thin film with 75 wt% alumina content. The absorption onset at 525 nm indicates that the perovskite forms even without thermal annealing.

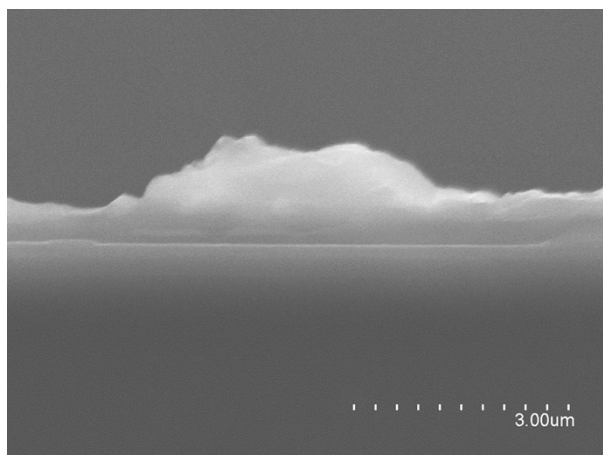

**Figure S3.** Cross-sectional SEM image of a  $\text{CH}_3\text{NH}_3\text{PbBr}_3/\text{Al}_2\text{O}_3$  NPs thin film on ITO/glass at 30 wt%  $\text{Al}_2\text{O}_3$ .

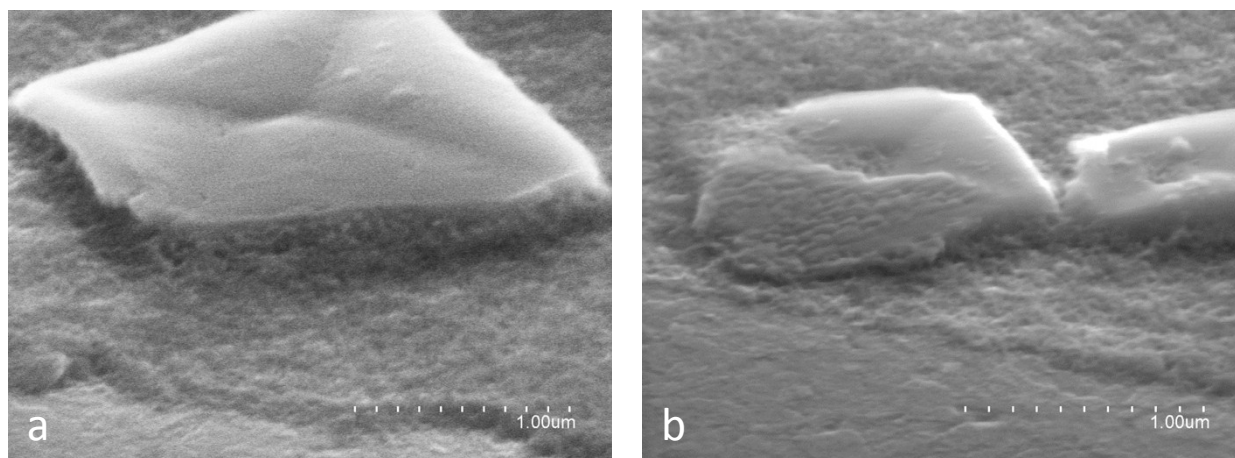

**Figure S4.** Tilted angle SEM images of a  $\text{CH}_3\text{NH}_3\text{PbBr}_3/\text{Al}_2\text{O}_3$  NPs thin film on ITO/glass at (a) 30 wt%  $\text{Al}_2\text{O}_3$  and (b) 50 wt%  $\text{Al}_2\text{O}_3$ . With increasing NPs content, the crystal formation is hindered.
